# Supplementary material
Source: MDPI journal article supplement (https://www.mdpi.com/2073-4344/13/1/4)

## Supplementary Materials:

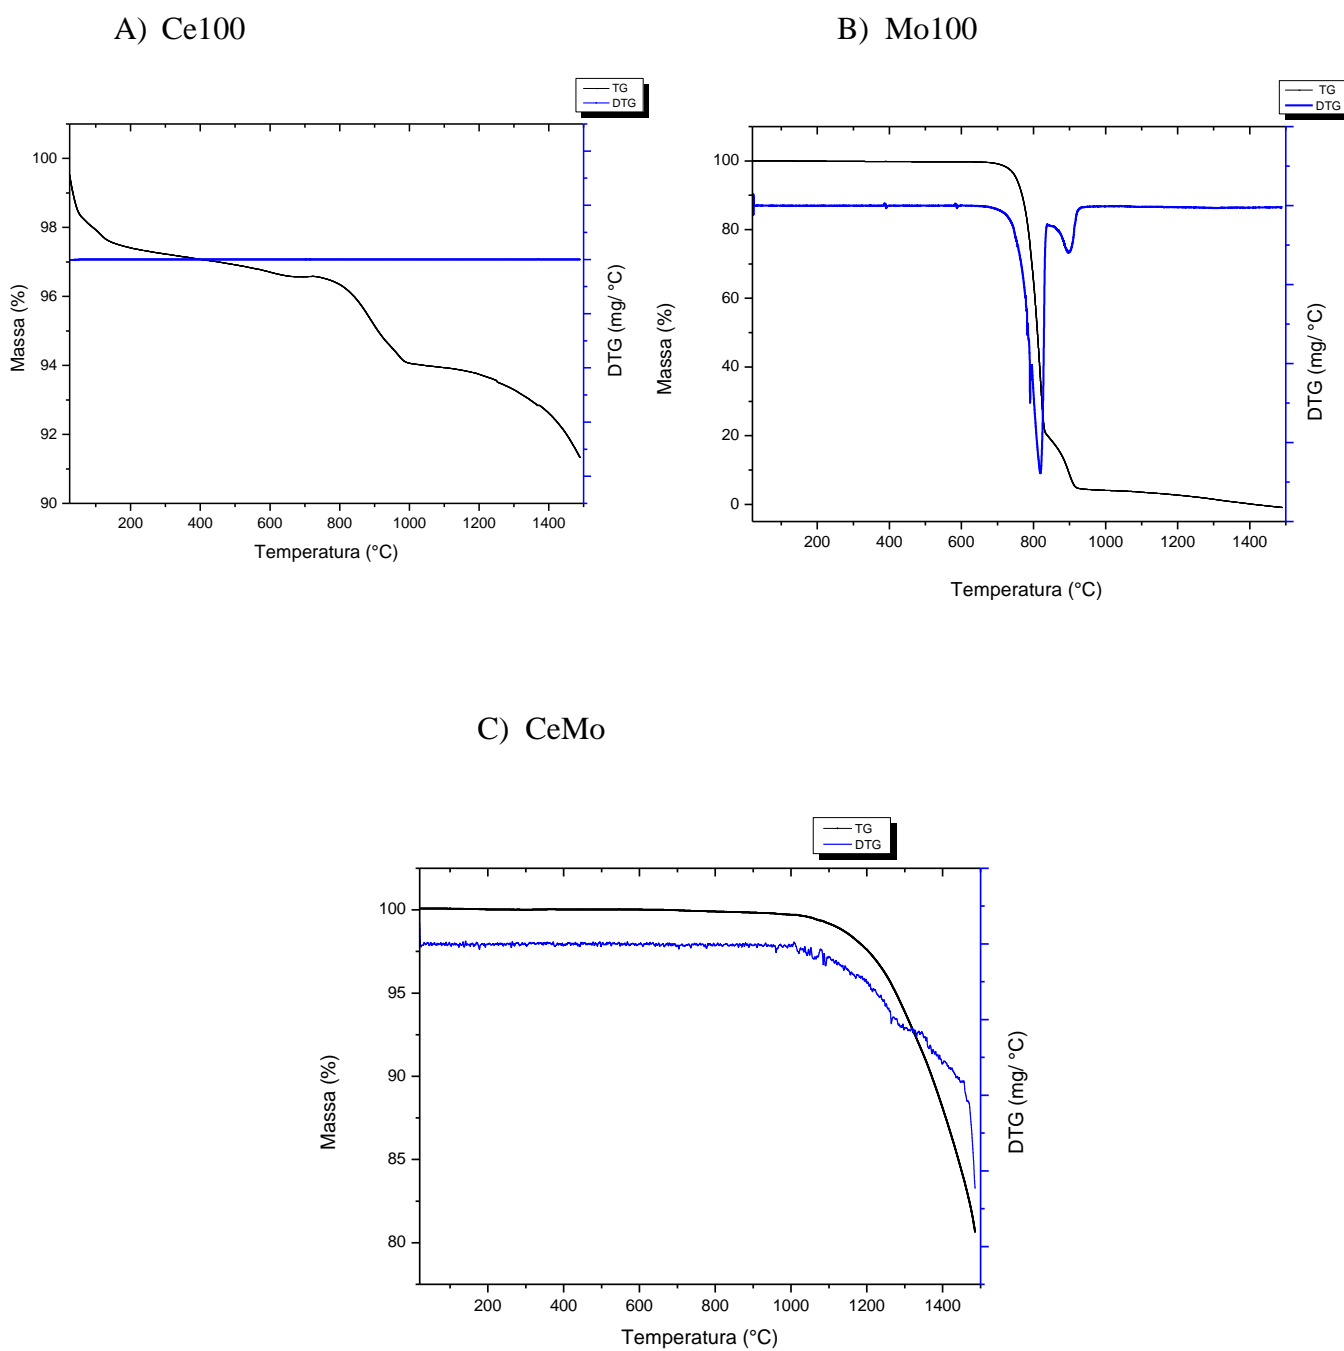

**Figure S1:** Thermogravimetric analysis (TG/DTG): A) Ce100 B) Mo100 and C) CeMo.

Supplement: s1 [file s1]
